# Instructions for Obtaining ANESTHESIOLOGY Continuing Medical Education (CME) Credit

CME Editors: Leslie C. Jameson, M.D., and Dan J. Kopacz, M.D.

ANESTHESIOLOGY's Journal CME is open to all readers. Members of the American Society of Anesthesiologists (ASA) enjoy a preferred rate for their subscription. However, Journal CME is not limited to ASA members or Journal subscribers. To take part in Journal CME, complete the following steps:

1. For the article listed on the right, read the learning objectives and disclosure information.
2. Read the article in the print or online edition.
3. Register at <http://education.asahq.org/2011-journal-cme> and provide payment.
4. Once online, complete the questions and other required information for the CME program, including the evaluation.

The American Society of Anesthesiologists is accredited by the Accreditation Council for Continuing Medical Education to provide continuing medical education for physicians.

The American Society of Anesthesiologists designates this journal-based CME activity for a maximum of 1 *AMA PRA Category 1 Credit(s)*<sup>TM</sup>. Physicians should claim only the credit commensurate with the extent of their participation in the activity.

**Purpose:** The focus of ANESTHESIOLOGY Journal CME is to educate readers on current developments in the science and clinical practice of anesthesiology.

**Target Audience:** ANESTHESIOLOGY Journal CME is designed for physicians involved with anesthesiology education, clinical practice, and research.

## Journal CME Planning Participants Disclosures

**Editor-in-Chief:** James C. Eisenach, M.D., returned a disclosure form indicating that he received consulting fees from Medtronic, Endo, and Solvay, and funded research from King Pharmaceuticals.

**CME Editors:** Leslie C. Jameson, M.D., and Dan J. Kopacz, M.D., have no relevant financial relationships to disclose.

**ASA Staff:** Employees involved in planning have no relevant financial relationships to disclose.

## Claiming Credit

All tests and requests for credit must be submitted through the ANESTHESIOLOGY CME website at <http://education.asahq.org/2011-journal-cme>. Participants should claim credit in 15-minute increments, for a maximum of 1 *AMA PRA Category 1 Credit(s)*<sup>TM</sup> per journal article.

Two payment options are available:

|            | ASA Member | Non-member |
|------------|------------|------------|
| Annual Fee | \$60       | \$120      |
| Per Issue  | \$10       | \$20       |

Payment may be made using Visa or MasterCard.

Please direct any questions about Journal CME to:

Joyce Canselor  
Education Coordinator, CME  
(847) 268-9185  
[j.canselor@asahq.org](mailto:j.canselor@asahq.org)

## This Month's ANESTHESIOLOGY Journal CME

Read the article by Cannesson *et al.* entitled "Assessing the diagnostic accuracy of pulse pressure variations for the prediction of fluid responsiveness: A 'gray zone' approach" on page 231 and the accompanying editorial by De Hert entitled "Assessment of fluid responsiveness: Insights in a 'gray zone'" on page 229 of this issue.

## Learning Objectives

After completing this activity, the learner should be able to identify patients who would benefit from use of pulse pressure variation analysis, know when to administer a fluid bolus to optimize cardiac output, and be able to compare patient responses to fluids in specific clinical situations.

## Authors Disclosures

**Authors:** Maxime Cannesson, M.D., Ph.D., received consulting fees from Edwards Lifesciences, Covidien, Masimo Corp., ConMed, Philips Medical Systems, CNSystems, BMEYE, and Fresenius Kabi. Yannick Le Manach, M.D., Ph.D., received consulting fees from Air Liquide Santé and received lecture/travel fees from Masimo Corp. and Fresenius Kabi. Christoph K. Hofer, M.D., received consulting fees from Pulsion Medical Systems, Edwards Lifesciences, CSL Behring, Benoît Vallet, M.D., Ph.D., received lecture/travel fees from Masimo Corp. and Edwards Lifesciences, Fresenius Kabi, and Baxter Corp. Benoît Tavernier, M.D., Ph.D., received lectures/travel fees from Masimo Corp. and Fresenius Kabi. Jean Pierre Goarin, M.D., and Jean-Jacques Lehot, M.D., Ph.D., have no financial interest in or affiliation with any commercial supporter or providers of any commercial services discussed in this educational material.

**Author:** Stefan G. De Hert, M.D., Ph.D., has no financial interest in or affiliation with any commercial supporter or providers of any commercial services discussed in this educational material.

## Expiration

Registration and submission of answers must be completed by August 31, 2014.
